# Supplementary material
Source: PubMed Central journal article supplement (PMC3685147)
Supplement: NIHMS473052-supplement-supplementary_data.pdf [file NIHMS473052-supplement-supplementary_data.pdf]

# SUPPORTING INFORMATION

## **Leonurenones A-C: Labdane Diterpenes from** *Leonotis leonurus*

Fang He,<sup>†</sup> Charlotte Lindqvist<sup>‡</sup> and Wayne W. Harding<sup>\*†</sup>

<sup>†</sup>Department of Chemistry, Hunter College, City University of New York, NY 10065, USA

<sup>‡</sup>Department of Biological Sciences, State University of New York, Buffalo, NY 14260, USA

Author to whom correspondence should be addressed: whardi@hunter.cuny.edu

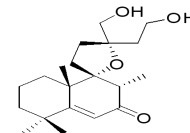

1

# Qualitative Compound Report

|                               |                                                          |                      |                      |
|-------------------------------|----------------------------------------------------------|----------------------|----------------------|
| <b>Data File</b>              | HCWHWH27C.d                                              | <b>Sample Name</b>   | FH-1-56B             |
| <b>Sample Type</b>            | Sample                                                   | <b>Position</b>      | P1-A1                |
| <b>Instrument Name</b>        | Instrument 1                                             | <b>User Name</b>     |                      |
| <b>Acq Method</b>             |                                                          | <b>Acquired Time</b> | 9/29/2010 1:16:51 PM |
| <b>IRM Calibration Status</b> | Success                                                  | <b>DA Method</b>     | HCEmpirical1.m       |
| <b>Comment</b>                | EM=318.2195 EM=HC ESI<br>Pos Small Molecule No<br>HPLC.m |                      |                      |

## Compound Table

| Compound Label  | RT   | Mass     | Abund | Formula  | Tgt Mass | Diff (ppm) |
|-----------------|------|----------|-------|----------|----------|------------|
| Cpd 1: C20H32O4 | 0.27 | 336.2307 | 2967  | C20H32O4 | 336.2301 | 1.86       |

| Compound Label  | RT   | Algorithm       | Mass     |
|-----------------|------|-----------------|----------|
| Cpd 1: C20H32O4 | 0.27 | Find By Formula | 336.2307 |

## MS Spectrum

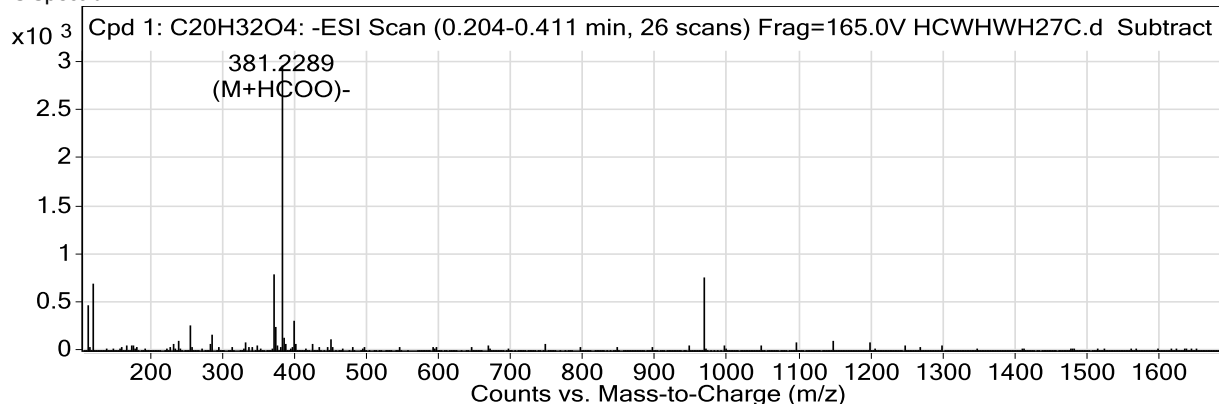

## MS Zoomed Spectrum

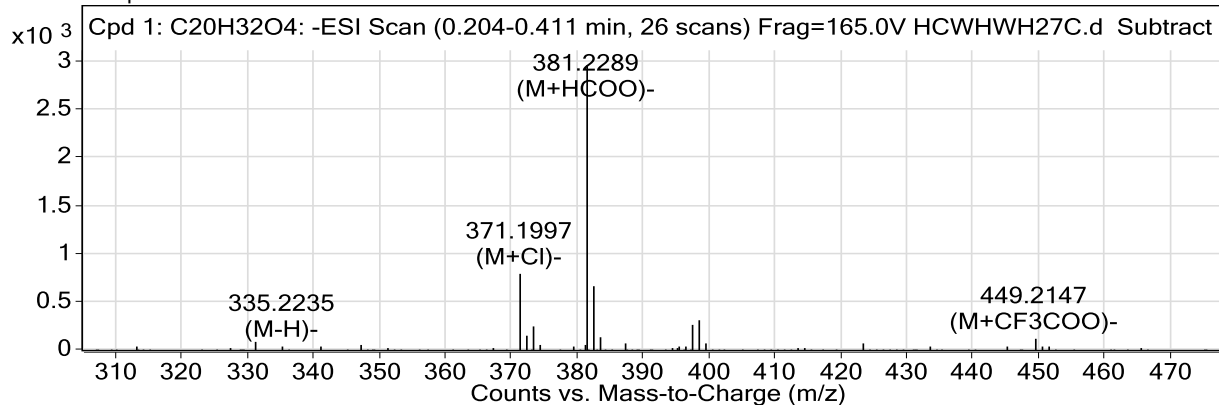

## MS Spectrum Peak List

| m/z      | Calc m/z | Diff(ppm) | z  | Abund | Formula       | Ion     |
|----------|----------|-----------|----|-------|---------------|---------|
| 335.2235 | 335.2228 | 2.04      | -1 | 52    | C20 H31 O4    | (M-H)-  |
| 371.1997 | 371.1995 | 0.51      | -1 | 806   | C20 H32 Cl O4 | (M+Cl)- |
| 372.2037 | 372.2029 | 2.31      | -1 | 161   | C20 H32 Cl O4 | (M+Cl)- |
| 373.1982 | 373.1973 | 2.36      | -1 | 254   | C20 H32 Cl O4 | (M+Cl)- |
| 374.2016 | 374.2003 | 3.34      | -1 | 57    | C20 H32 Cl O4 | (M+Cl)- |
| 377.1993 |          |           |    | 15    |               |         |
| 379.2104 |          |           |    | 41    |               |         |

# Qualitative Compound Report

| <i>m/z</i> | <i>Calc m/z</i> | <i>Diff(ppm)</i> | <i>z</i> | <i>Abund</i> | <i>Formula</i> | <i>Ion</i>  |
|------------|-----------------|------------------|----------|--------------|----------------|-------------|
| 380.9777   |                 |                  |          | 65           |                |             |
| 381.2289   | 381.2283        | 1.69             |          | 2967         | C21 H33 O6     | (M+HCOO)-   |
| 381.4058   |                 |                  |          | 22           |                |             |
| 382.2313   | 382.2317        | -0.88            |          | 678          | C21 H33 O6     | (M+HCOO)-   |
| 383.2329   | 383.2343        | -3.43            |          | 140          | C21 H33 O6     | (M+HCOO)-   |
| 385.1869   |                 |                  |          | 17           |                |             |
| 449.2147   | 449.2156        | -2.05            | -1       | 127          | C22 H32 F3 O6  | (M+CF3COO)- |
| 450.2137   | 450.2191        | -11.85           | -1       | 40           | C22 H32 F3 O6  | (M+CF3COO)- |

--- End Of Report ---

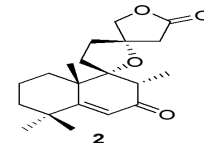

# Qualitative Compound Report

|                               |                                                                      |                      |                      |
|-------------------------------|----------------------------------------------------------------------|----------------------|----------------------|
| <b>Data File</b>              | HCWHWH31A.d                                                          | <b>Sample Name</b>   | FH-1-54B             |
| <b>Sample Type</b>            | Sample                                                               | <b>Position</b>      | P1-A1                |
| <b>Instrument Name</b>        | Instrument 1                                                         | <b>User Name</b>     |                      |
| <b>Acq Method</b>             |                                                                      | <b>Acquired Time</b> | 11/3/2010 7:55:28 PM |
| <b>IRM Calibration Status</b> | Success                                                              | <b>DA Method</b>     | HCEmpirical1.m       |
| <b>Comment</b>                | EM=332.1988 EM=HC HC<br>ESI Pos Small Molecule No<br>HPLC.m modified |                      |                      |

## Compound Table

| Compound Label  | RT    | Mass     | Abund | Formula  | Tgt Mass | Diff (ppm) |
|-----------------|-------|----------|-------|----------|----------|------------|
| Cpd 1: C20H28O4 | 0.219 | 332.1994 | 32645 | C20H28O4 | 332.1988 | 1.79       |

| Compound Label  | RT    | Algorithm       | Mass     |
|-----------------|-------|-----------------|----------|
| Cpd 1: C20H28O4 | 0.219 | Find By Formula | 332.1994 |

## MS Spectrum

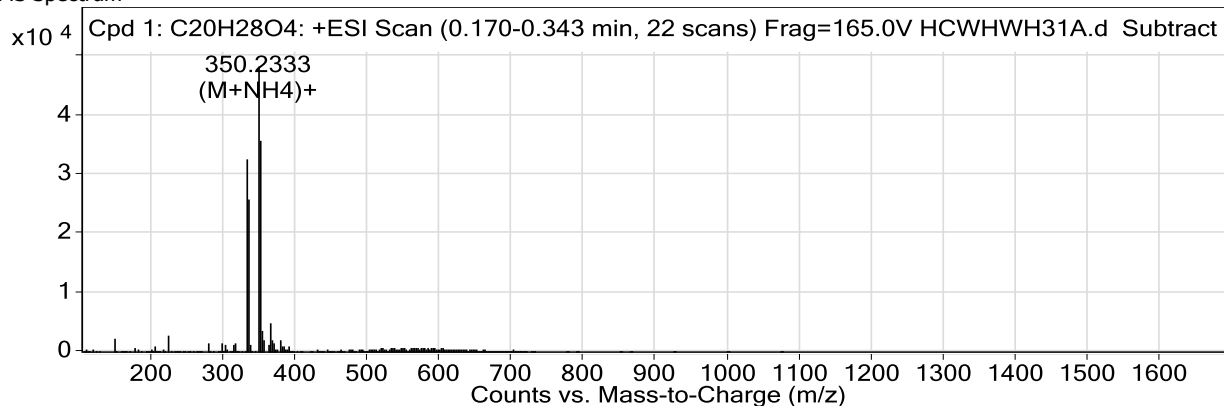

## MS Zoomed Spectrum

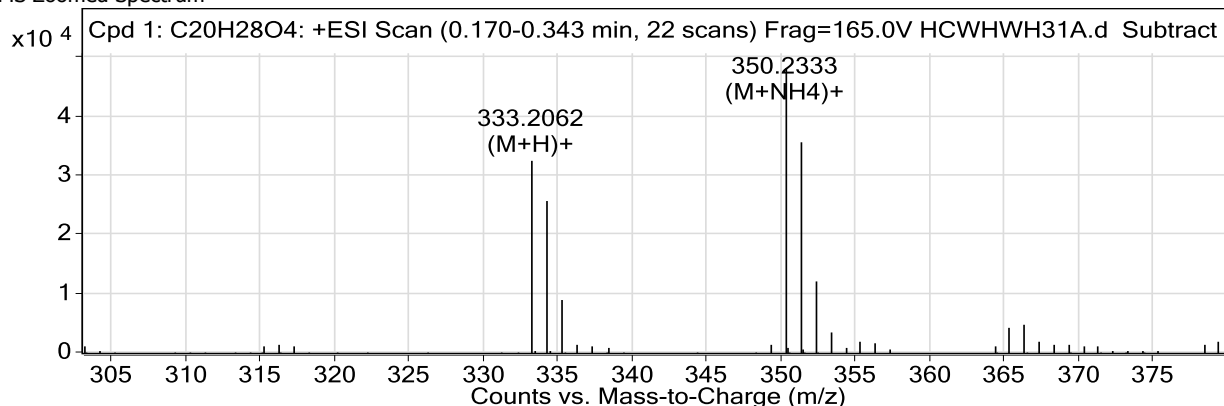

## MS Spectrum Peak List

| m/z      | Calc m/z | Diff(ppm) | z | Abund | Formula      | Ion      |
|----------|----------|-----------|---|-------|--------------|----------|
| 333.2062 | 333.206  | 0.55      | 1 | 32645 | C20 H29 O4   | (M+H)+   |
| 348.2239 |          |           |   | 256   |              |          |
| 349.2037 |          |           |   | 1587  |              |          |
| 350.2333 | 350.2326 | 2.06      |   | 48217 | C20 H32 N O4 | (M+NH4)+ |
| 350.4016 |          |           |   | 1017  |              |          |
| 350.4727 |          |           |   | 179   |              |          |

# Qualitative Compound Report

| <i>m/z</i> | <i>Calc m/z</i> | <i>Diff(ppm)</i> | <i>z</i> | <i>Abund</i> | <i>Formula</i> | <i>Ion</i> |
|------------|-----------------|------------------|----------|--------------|----------------|------------|
| 351.239    |                 |                  |          | 35874        |                |            |
| 351.4067   |                 |                  |          | 828          |                |            |
| 351.4688   |                 |                  |          | 281          |                |            |
| 351.7579   |                 |                  |          | 130          |                |            |
| 352.2419   |                 |                  |          | 12231        |                |            |
| 352.41     |                 |                  |          | 255          |                |            |
| 353.2389   |                 |                  |          | 3763         |                |            |
| 354.2646   |                 |                  |          | 1160         |                |            |
| 355.1899   |                 |                  |          | 2214         |                |            |

--- End Of Report ---

---

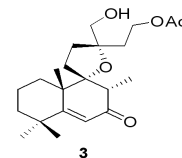

# Qualitative Compound Report

|                               |                                                   |                      |                      |
|-------------------------------|---------------------------------------------------|----------------------|----------------------|
| <b>Data File</b>              | HCWHWH57A.d                                       | <b>Sample Name</b>   | FH-1-95              |
| <b>Sample Type</b>            | Sample                                            | <b>Position</b>      | P1-A1                |
| <b>Instrument Name</b>        | Instrument 1                                      | <b>User Name</b>     |                      |
| <b>Acq Method</b>             |                                                   | <b>Acquired Time</b> | 3/23/2011 7:48:56 PM |
| <b>IRM Calibration Status</b> | Success                                           | <b>DA Method</b>     | HCEmpirical1.m       |
| <b>Comment</b>                | EM=378.2406 M=HC ESI Pos Small Molecule No HPLC.m |                      |                      |

|                     |                |
|---------------------|----------------|
| <b>Sample Group</b> | <b>Info.</b>   |
| User Defined 1      | User Defined 2 |

## Compound Table

| Compound Label | RT    | Mass     | Abund | Formula  | Tgt Mass | Diff (ppm) | MFG Formula | DB Formula |
|----------------|-------|----------|-------|----------|----------|------------|-------------|------------|
| Cpd 1:         | 0.229 | 378.2407 | 54741 | C22H34O5 | 378.2406 | 0.14       | C22H34O5    | C22H34O5   |

| Compound Label | m/z      | RT    | Algorithm       | Mass     |
|----------------|----------|-------|-----------------|----------|
| Cpd 1:         | 402.2337 | 0.229 | Find By Formula | 378.2407 |

## MS Spectrum

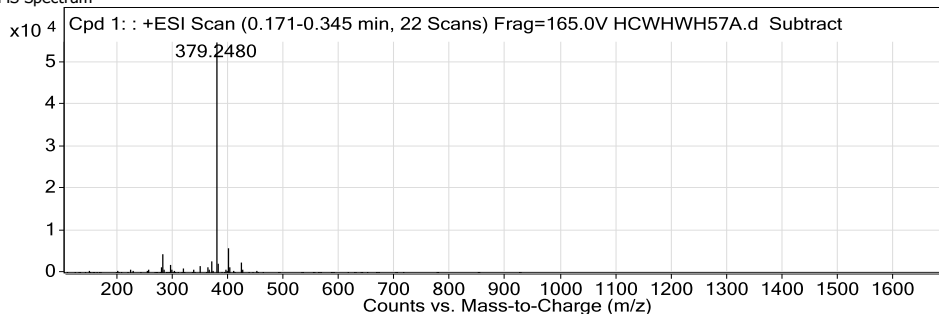

## MS Zoomed Spectrum

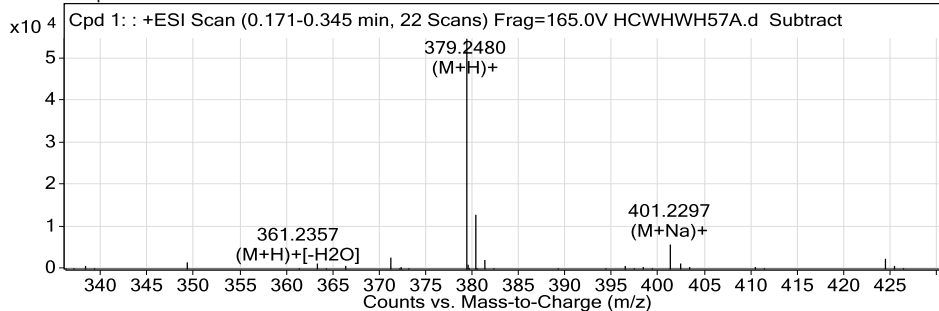

## MS Spectrum Peak List

| m/z      | Calc m/z | Diff(ppm) | z | Abund   | Formula    | Ion          |
|----------|----------|-----------|---|---------|------------|--------------|
| 361.2357 | 361.2373 | -4.45     | 1 | 357.8   | C22H33O4   | (M+H)+[-H2O] |
| 362.2313 | 362.2407 | -25.96    | 1 | 82.6    | C22H33O4   | (M+H)+[-H2O] |
| 379.248  |          |           |   | 54740.9 |            |              |
| 379.248  | 379.2479 | 0.16      | 1 | 54740.9 | C22H35O5   | (M+H)+       |
| 380.2509 | 380.2513 | -1.13     | 1 | 13100.3 | C22H35O5   | (M+H)+       |
| 381.2523 | 381.254  | -4.53     | 1 | 2209.3  | C22H35O5   | (M+H)+       |
| 382.2585 | 382.2567 | 4.56      | 1 | 332     | C22H35O5   | (M+H)+       |
| 383.2669 | 383.2594 | 19.5      | 1 | 34.6    | C22H35O5   | (M+H)+       |
| 396.2734 | 396.2744 | -2.55     | 1 | 892.8   | C22H38NO5  | (M+NH4)+     |
| 397.2687 | 397.2778 | -22.71    | 1 | 46.9    | C22H38NO5  | (M+NH4)+     |
| 398.2549 | 398.2805 | -64.29    | 1 | 472.9   | C22H38NO5  | (M+NH4)+     |
| 401.2297 | 401.2298 | -0.42     | 1 | 6021.3  | C22H34NaO5 | (M+Na)+      |
| 402.2337 | 402.2333 | 1.03      | 1 | 1445.9  | C22H34NaO5 | (M+Na)+      |

--- End Of Report ---
